# Supplementary material
Source: MDPI journal article supplement (https://www.mdpi.com/2073-4441/9/5/362)
Supplement: s1 [file s1]

# Supplementary Materials: Thermal and Physical Investigations into Lake Deepening Processes on Spillway Lake, Ngozumpa Glacier, Nepal

Ulyana Horodyskyj

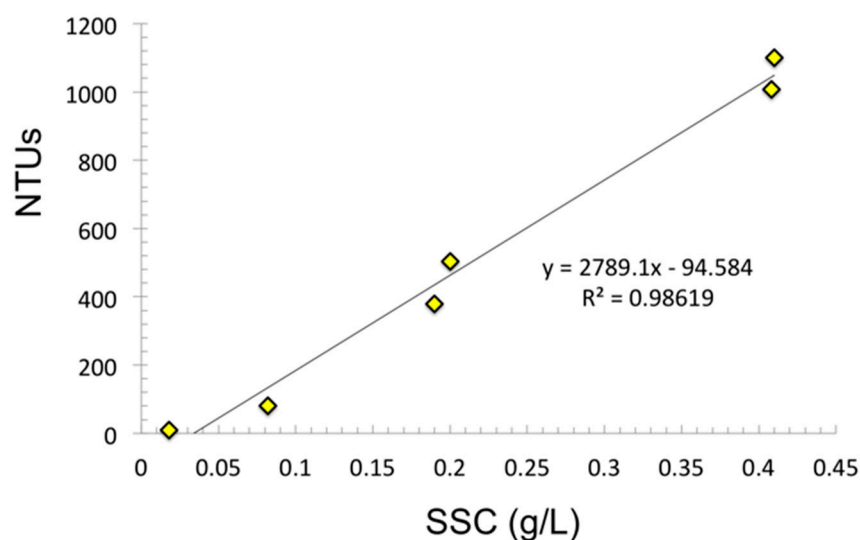

**Figure S1.** Conversion of field and lab-measured turbidity values (NTU) to suspended sediment concentration (SSC) in g/L.

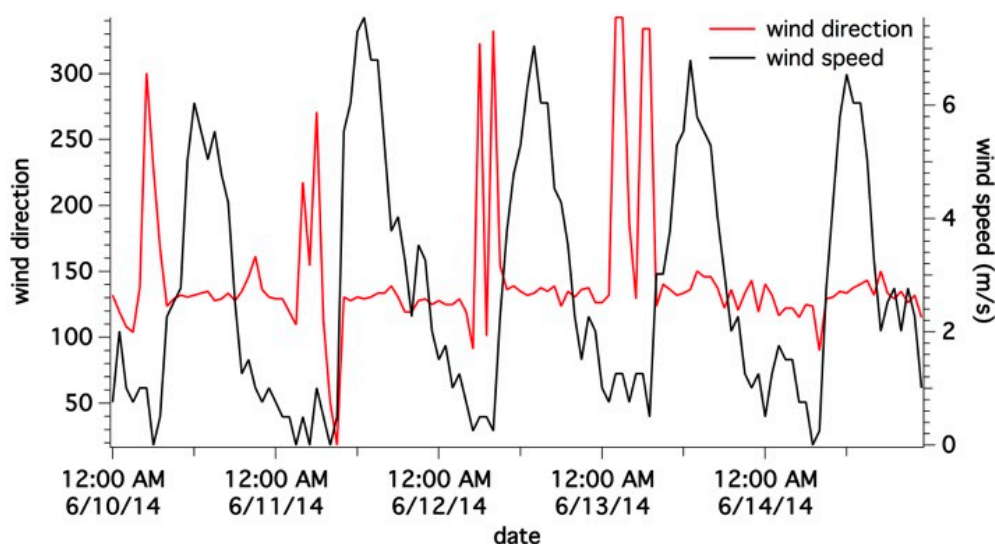

**Figure S2.** Wind direction (red) and wind speed (black) data subset from June 2014. General trends include highest wind speeds ( $>5$  m/s) in the afternoon, starting at 12 p.m. During the day, wind direction ( $\sim 130^\circ$ ) comes via valley winds from the southeast. At night, wind direction ( $\sim 250\text{--}300^\circ$ ), and speed ( $<2$  m/s) switch to weaker northwesterly mountain downdrafts.

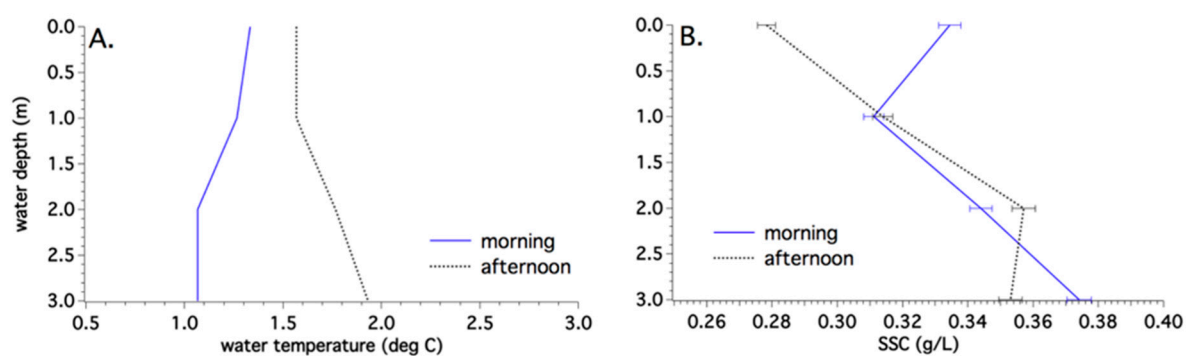

**Figure S3.** SW sub-basin temperature (A) and suspended sediment concentration (B) with depth. Shallow depth leads to much higher overall temperatures from top to bottom. Similar to the other sub-basins, SSC increases with depth indicating a stable density structure.

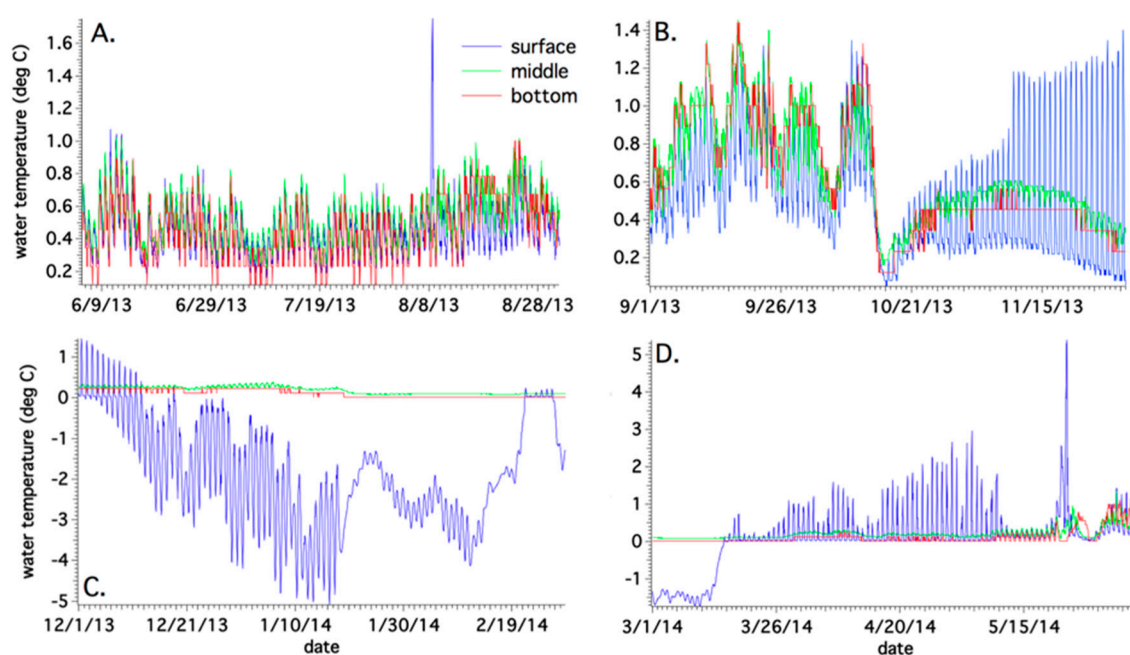

**Figure S4.** Seasonal temperature variations in NW sub-basin buoy location for the monsoon (A); fall (B); winter (C) and spring (D). Surface in blue; middle in green; bottom in red.

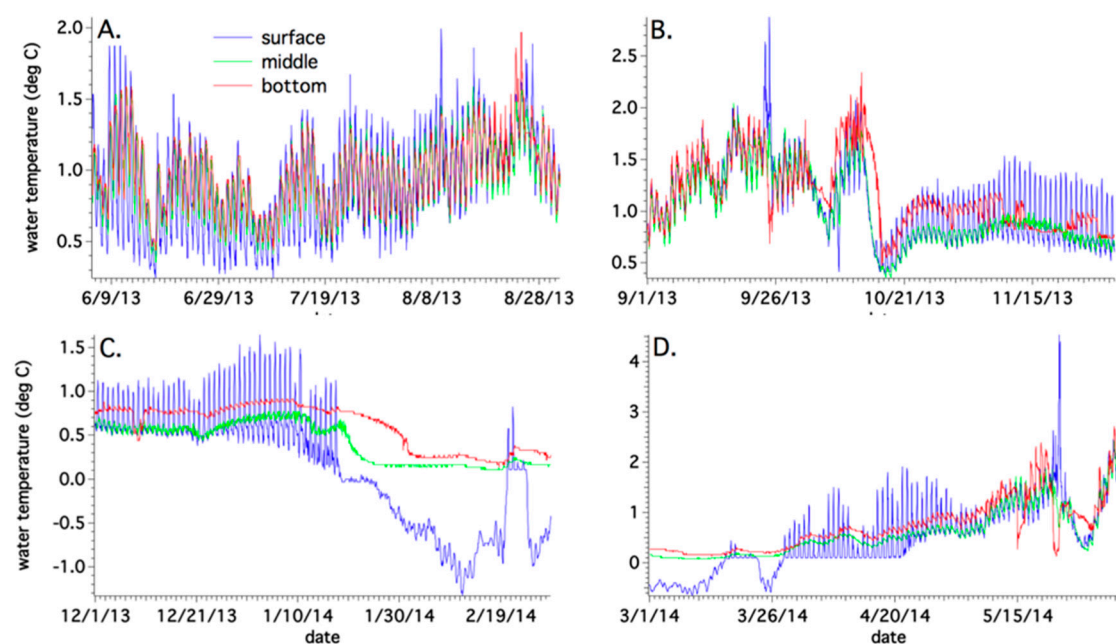

**Figure S5.** Seasonal temperature variations in NE sub-basin buoy location for the monsoon (A); fall (B); winter (C) and spring (D). Surface in blue; middle in green; bottom in red.

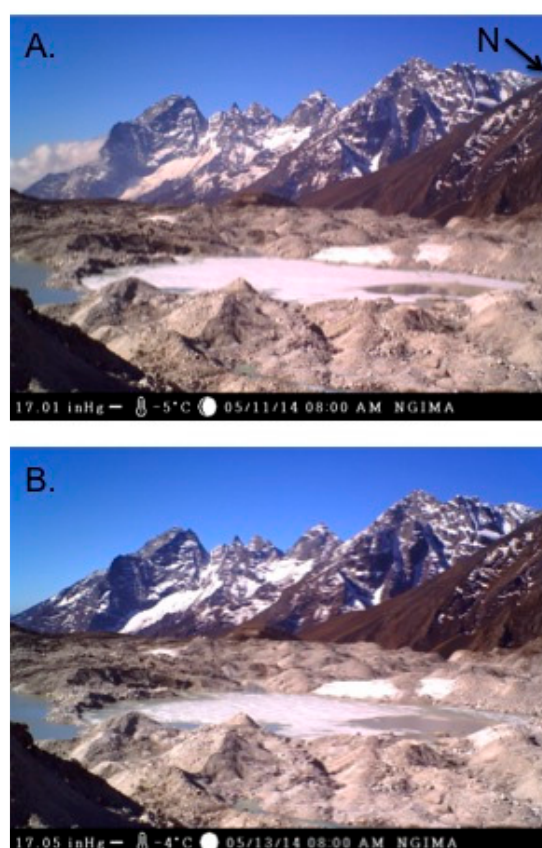

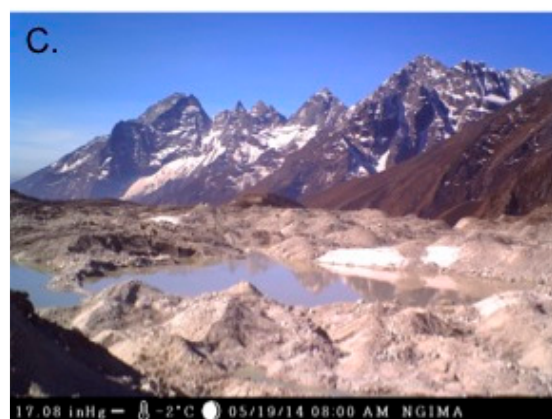

**Figure S6.** Time-lapse sequence of the Main sub-basin thaw from 11 May to 19 May 2014.

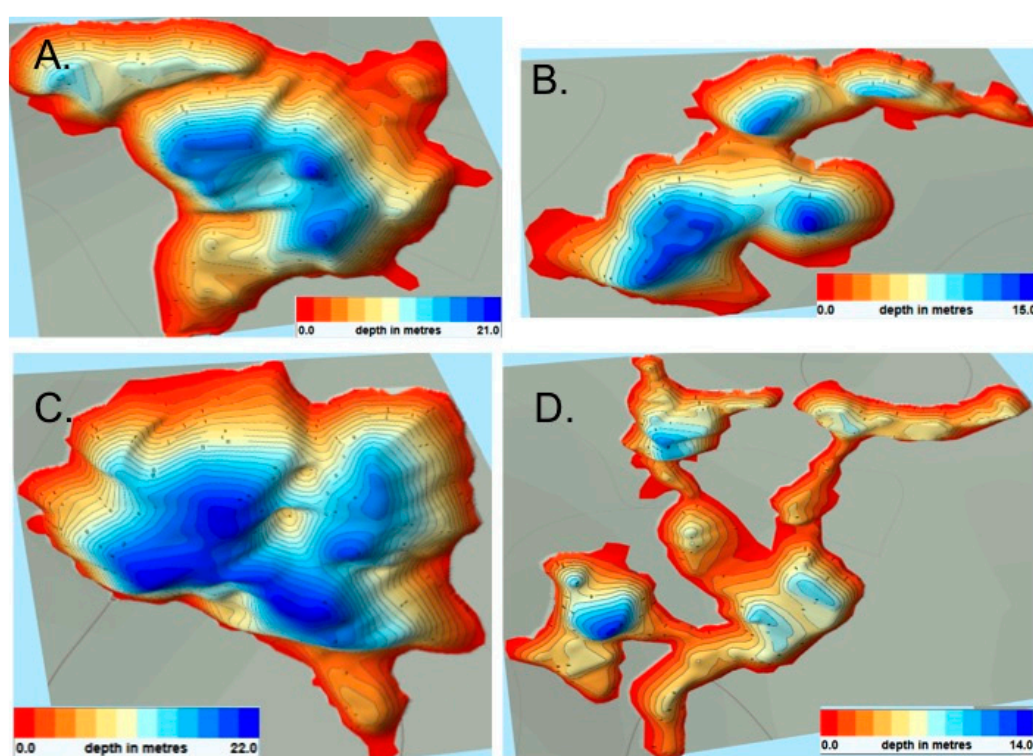

**Figure S7.** Derived 3D models of the sub-basins, with 2–3 × vertical exaggeration. NW sub-basin (A); NE sub-basin (B); Main sub-basin (C) and SW sub-basin with surroundings (D).



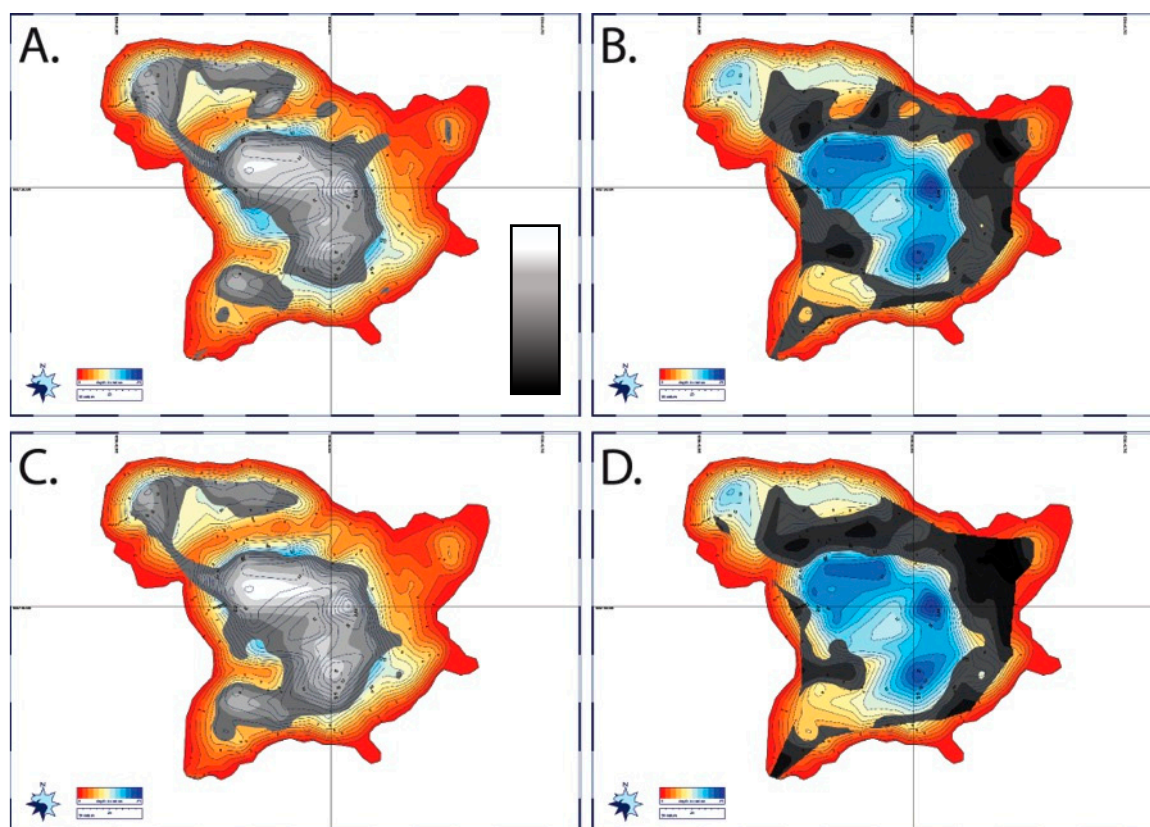

**Figure S8.** NW sub-basin roughness and hardness maps, generated from E1 and Peak Sv acoustic backscatter values. Smooth (A); rough (B); soft (C) and hard (D) are shown.

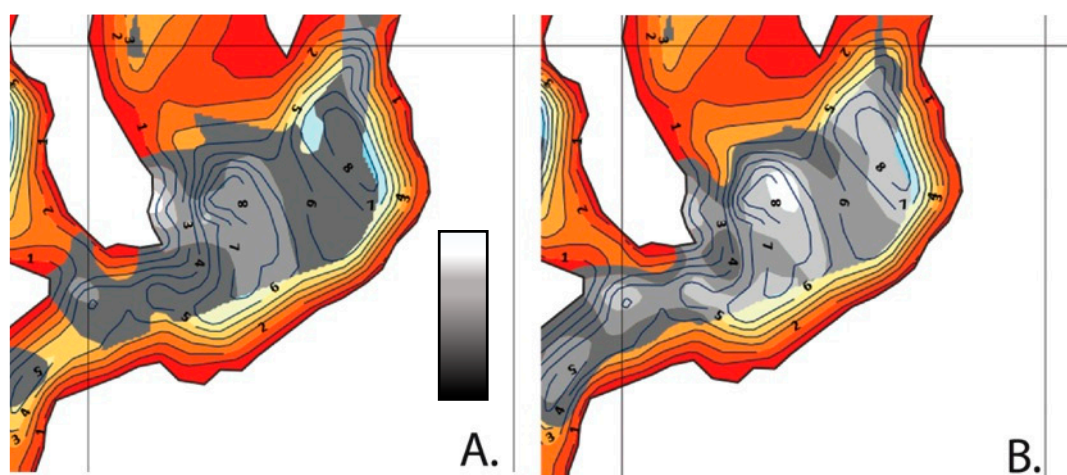

**Figure S9.** Zoom-in of SW sub-basin roughness and hardness maps, generated from E1 and Peak Sv acoustic backscatter values. Smooth (A) and soft (B) are shown, showing good overlap and consistent with high sedimentation rates in this region.

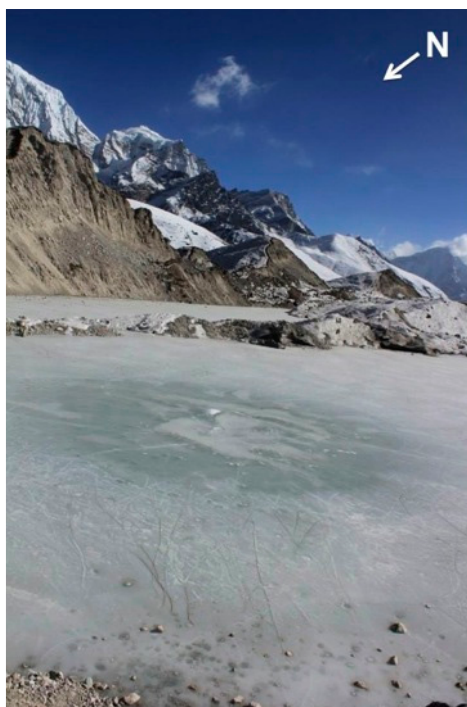

**Figure S10.** Frozen-over upwelling (December 2013) in the northeastern part of Main basin, Spillway Lake.

**Table S1.** Six samples (one from each sub-basin (with repeat done for NE sub-basin); and two different locales within the Main sub-basin) and the average values for thermal conductivity ( $k$ ), thermal resistivity ( $\rho$ ), volumetric heat capacity ( $C$ ) and thermal diffusivity ( $D$ ), with error.

| Samples (rock/mud mix) | K (W/(m·K))  | RHO (°C·cm/W) | C (MJ/(m <sup>3</sup> ·K)) | D (mm <sup>2</sup> /s) | Error        |
|------------------------|--------------|---------------|----------------------------|------------------------|--------------|
| NW sub-basin           | 1.964        | 50.9          | 2.707                      | 0.726                  | 0.0058       |
| NE sub-basin           | 1.663        | 60.1          | 2.686                      | 0.619                  | 0.005        |
| Main sub-basin         | 1.764        | 56.7          | 2.572                      | 0.686                  | 0.008        |
| Main sub-basin         | 1.813        | 55.1          | 2.768                      | 0.655                  | 0.009        |
| NE sub-basin (repeat)  | 1.663        | 60.1          | 3.098                      | 0.537                  | 0.0067       |
| SW sub-basin           | 1.868        | 53.5          | 2.464                      | 0.758                  | 0.0044       |
| <b>Average</b>         | <b>1.789</b> | <b>56.067</b> | <b>2.716</b>               | <b>0.664</b>           | <b>0.006</b> |

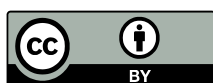

© 2017 by the authors. Submitted for possible open access publication under the terms and conditions of the Creative Commons Attribution (CC BY) license (<http://creativecommons.org/licenses/by/4.0/>).
